# Supplementary material for: SETD3 is a positive regulator of DNA-damage-induced apoptosis
Source: PubMed Central journal article supplement (PMC6347638; doi:10.1038/s41419-019-1328-4), 2019-01-25
Supplement: 41419_2019_1328_MOESM6_ESM.pdf [file 41419_2019_1328_MOESM6_ESM.pdf]

| UNIPROT<br>Accession | Gene Name | Description                    | Coverage | # Peptides | # PSMs | # Unique P | # AAs | MW [kDa] | calc. pI |
|----------------------|-----------|--------------------------------|----------|------------|--------|------------|-------|----------|----------|
| U3KQT1               | ESD       | S-formylglutathione hydrolas   | 5.833333 | 1          | 1      | 1          | 120   | 13.101   | 8.69     |
| Q9Y6V7               | DDX49     | Probable ATP-dependent RN      | 2.070393 | 1          | 2      | 1          | 483   | 54.192   | 9.06     |
| Q9Y6J9               | TAF6L     | TAF6-like RNA polymerase II    | 3.697749 | 1          | 2      | 1          | 622   | 67.772   | 8.97     |
| Q9Y6B6               | SAR1B     | GTP-binding protein SAR1b C    | 16.16162 | 4          | 16     | 1          | 198   | 22.396   | 6.11     |
| Q9Y446               | PKP3      | Plakophilin-3 OS=Homo sapie    | 2.007528 | 1          | 2      | 1          | 797   | 87.029   | 9.32     |
| Q9Y3C7               | MED31     | Mediator of RNA polymerase     | 12.9771  | 1          | 2      | 1          | 131   | 15.795   | 8.54     |
| Q9Y3B3               | TMED7     | Transmembrane emp24 dom        | 5.357143 | 1          | 2      | 1          | 224   | 25.156   | 6.89     |
| Q9Y2H1               | STK38L    | Serine/threonine-protein kin   | 6.034483 | 2          | 5      | 1          | 464   | 53.968   | 6.81     |
| Q9ULG1               | INO80     | DNA helicase INO80 OS=Horr     | 1.092545 | 1          | 2      | 1          | 1556  | 176.643  | 9.5      |
| Q9ULC5               | ACSL5     | Long-chain-fatty-acid--CoA lig | 1.903367 | 1          | 2      | 1          | 683   | 75.942   | 6.92     |
| Q9UKZ1               | CNOT11    | CCR4-NOT transcription com     | 2.352941 | 1          | 2      | 1          | 510   | 55.18    | 6.4      |
| Q9UI14               | RABAC1    | Prenylated Rab acceptor prot   | 12.43243 | 1          | 1      | 1          | 185   | 20.635   | 7.34     |
| Q9UHI6               | DDX20     | Probable ATP-dependent RN      | 1.213592 | 1          | 2      | 1          | 824   | 92.183   | 6.95     |
| Q9UHD2               | TBK1      | Serine/threonine-protein kin   | 1.508916 | 1          | 2      | 1          | 729   | 83.589   | 6.79     |
| Q9UBD5               | ORC3      | Origin recognition complex s   | 2.531646 | 1          | 2      | 1          | 711   | 82.201   | 7.61     |
| Q9P275               | USP36     | Ubiquitin carboxyl-terminal h  | 1.873327 | 1          | 2      | 1          | 1121  | 122.575  | 9.67     |
| Q9P086               | MED11     | Mediator of RNA polymerase     | 16.23932 | 1          | 2      | 1          | 117   | 13.121   | 5.96     |
| Q9NYB0               | TERF2IP   | Telomeric repeat-binding fac   | 7.26817  | 1          | 2      | 1          | 399   | 44.233   | 4.73     |
| Q9NY12               | GAR1      | H/ACA ribonucleoprotein cor    | 3.225806 | 1          | 2      | 1          | 217   | 22.334   | 10.92    |
| Q9NXV6               | CDKN2AIP  | CDKN2A-interacting protein C   | 4.655172 | 2          | 4      | 2          | 580   | 61.088   | 9.01     |
| Q9NXB0               | MKS1      | Meckel syndrome type 1 prot    | 1.788909 | 1          | 1      | 1          | 559   | 64.487   | 6.46     |
| Q9NX58               | LYAR      | Cell growth-regulating nuclec  | 3.693931 | 1          | 1      | 1          | 379   | 43.588   | 9.54     |
| Q9NX24               | NHP2      | H/ACA ribonucleoprotein cor    | 6.535948 | 1          | 2      | 1          | 153   | 17.19    | 8.22     |
| Q9NVN8               | GNL3L     | Guanine nucleotide-binding p   | 2.233677 | 1          | 2      | 1          | 582   | 65.532   | 8.44     |
| Q9NVJ2               | ARL8B     | ADP-ribosylation factor-like p | 15.05376 | 3          | 8      | 1          | 186   | 21.525   | 8.43     |
| Q9NVC6               | MED17     | Mediator of RNA polymerase     | 1.228879 | 1          | 2      | 1          | 651   | 72.845   | 7.44     |
| Q9NUQ6               | SPATS2L   | SPATS2-like protein OS=Horr    | 3.584229 | 1          | 2      | 1          | 558   | 61.691   | 9.64     |
| Q9NRY2               | INIP      | SOSS complex subunit C OS=f    | 11.53846 | 1          | 1      | 1          | 104   | 11.418   | 9.25     |
| Q9NRL2               | BAZ1A     | Bromodomain adjacent to zir    | 1.156812 | 1          | 2      | 1          | 1556  | 178.592  | 6.6      |
| Q9NQ29               | LUC7L     | Putative RNA-binding protein   | 9.703504 | 3          | 6      | 1          | 371   | 43.701   | 9.92     |
| Q9HC07               | TMEM165   | Transmembrane protein 165      | 7.716049 | 1          | 2      | 1          | 324   | 34.883   | 7.02     |
| Q9HBH0               | RHOF      | Rho-related GTP-binding pro    | 9.952607 | 2          | 4      | 2          | 211   | 23.61    | 8.65     |

|        |          |                                |          |   |    |   |      |         |      |
|--------|----------|--------------------------------|----------|---|----|---|------|---------|------|
| Q9H4L7 | SMARCAD1 | SWI/SNF-related matrix-asso    | 1.169591 | 1 | 2  | 1 | 1026 | 117.328 | 5.55 |
| Q9H1I8 | ASCC2    | Activating signal cointegrator | 1.321004 | 1 | 2  | 1 | 757  | 86.306  | 5.16 |
| Q9H1E3 | NUCKS1   | Nuclear ubiquitous casein an   | 14.81481 | 2 | 5  | 2 | 243  | 27.28   | 5.08 |
| Q9H1B7 | IRF2BPL  | Interferon regulatory factor 2 | 6.281407 | 3 | 6  | 3 | 796  | 82.607  | 8.24 |
| Q9H0D6 | XRN2     | 5'-3' exoribonuclease 2 OS=H   | 3.052632 | 2 | 4  | 2 | 950  | 108.513 | 7.47 |
| Q9H089 | LSG1     | Large subunit GTPase 1 hom     | 1.06383  | 1 | 1  | 1 | 658  | 75.178  | 6.38 |
| Q9C0J8 | WDR33    | pre-mRNA 3' end processing     | 1.347305 | 1 | 1  | 1 | 1336 | 145.799 | 9.17 |
| Q9BZJ0 | CRNKL1   | Crooked neck-like protein 1 C  | 1.415094 | 1 | 2  | 1 | 848  | 100.389 | 8    |
| Q9BZ95 | NSD3     | Histone-lysine N-methyltrans   | 1.600557 | 1 | 1  | 1 | 1437 | 161.509 | 8.21 |
| Q9BYJ9 | YTHDF1   | YTH domain-containing famil    | 9.660107 | 3 | 19 | 1 | 559  | 60.836  | 8.79 |
| Q9BWE0 | REPIN1   | Replication initiator 1 OS=Ho  | 2.645503 | 1 | 2  | 1 | 567  | 63.534  | 9.98 |
| Q9BSR8 | YIPF4    | Protein YIPF4 OS=Homo sapi     | 3.688525 | 1 | 2  | 1 | 244  | 27.065  | 4.65 |
| Q9BRK5 | SDF4     | 45 kDa calcium-binding prote   | 2.762431 | 1 | 2  | 1 | 362  | 41.78   | 4.86 |
| Q9BQ75 | CMSS1    | Protein CMSS1 OS=Homo sap      | 4.659498 | 1 | 2  | 1 | 279  | 31.864  | 9.19 |
| Q9BQ39 | DDX50    | ATP-dependent RNA helicase     | 1.221167 | 1 | 2  | 1 | 737  | 82.514  | 9.17 |
| Q9BQ15 | NABP2    | SOSS complex subunit B1 OS-    | 10.42654 | 1 | 4  | 1 | 211  | 22.324  | 9.06 |
| Q99986 | VRK1     | Serine/threonine-protein kin   | 6.818182 | 1 | 3  | 1 | 396  | 45.447  | 8.91 |
| Q96ST2 | IWS1     | Protein IWS1 homolog OS=H      | 1.709402 | 1 | 2  | 1 | 819  | 91.899  | 4.69 |
| Q96RE7 | NACC1    | Nucleus accumbens-associat     | 2.466793 | 1 | 2  | 1 | 527  | 57.222  | 5.74 |
| Q96JM7 | L3MBTL3  | Lethal(3)malignant brain tum   | 1.666667 | 1 | 2  | 1 | 780  | 88.28   | 6.46 |
| Q96I18 | LRCH3    | Leucine-rich repeat and calpo  | 1.544402 | 1 | 2  | 1 | 777  | 86.03   | 6.71 |
| Q96HS1 | PGAM5    | Serine/threonine-protein ph    | 3.460208 | 1 | 2  | 1 | 289  | 31.985  | 8.68 |
| Q96EP5 | DAZAP1   | DAZ-associated protein 1 OS-   | 3.685504 | 1 | 2  | 1 | 407  | 43.356  | 8.56 |
| Q96DT7 | ZBTB10   | Zinc finger and BTB domain-d   | 0.918485 | 1 | 2  | 1 | 871  | 94.835  | 5.16 |
| Q96A65 | EXOC4    | Exocyst complex component      | 3.38809  | 2 | 4  | 2 | 974  | 110.429 | 6.49 |
| Q92736 | RYR2     | Ryanodine receptor 2 OS=Ho     | 0.181196 | 1 | 2  | 1 | 4967 | 564.206 | 6.07 |
| Q92621 | NUP205   | Nuclear pore complex protei    | 0.745527 | 1 | 2  | 1 | 2012 | 227.776 | 6.19 |
| Q92620 | DHX38    | Pre-mRNA-splicing factor ATP   | 1.385493 | 1 | 2  | 1 | 1227 | 140.415 | 6.54 |
| Q92610 | ZNF592   | Zinc finger protein 592 OS=H   | 1.736385 | 1 | 2  | 1 | 1267 | 137.441 | 7.84 |
| Q92597 | NDRG1    | Protein NDRG1 OS=Homo sap      | 3.553299 | 1 | 2  | 1 | 394  | 42.808  | 5.82 |
| Q92576 | PHF3     | PHD finger protein 3 OS=Hor    | 0.784698 | 1 | 1  | 1 | 2039 | 229.339 | 6.96 |
| Q92499 | DDX1     | ATP-dependent RNA helicase     | 2.162162 | 1 | 2  | 1 | 740  | 82.38   | 7.23 |
| Q8WXD5 | GEMIN6   | Gem-associated protein 6 OS    | 7.784431 | 1 | 2  | 1 | 167  | 18.812  | 5.12 |
| Q8WUA4 | GTF3C2   | General transcription factor 3 | 2.963776 | 1 | 2  | 1 | 911  | 100.616 | 7.31 |

|        |          |                                |          |   |   |   |      |         |       |
|--------|----------|--------------------------------|----------|---|---|---|------|---------|-------|
| Q8TEK3 | DOT1L    | Histone-lysine N-methyltrans   | 2.415181 | 2 | 3 | 2 | 1739 | 184.74  | 9.33  |
| Q8TC12 | RDH11    | Retinol dehydrogenase 11 OS=H  | 4.402516 | 1 | 2 | 1 | 318  | 35.363  | 8.82  |
| Q8TAT6 | NPLOC4   | Nuclear protein localization p | 1.644737 | 1 | 2 | 1 | 608  | 68.077  | 6.38  |
| Q8TA86 | RP9      | Retinitis pigmentosa 9 protei  | 9.049774 | 2 | 4 | 2 | 221  | 26.091  | 9.79  |
| Q8NHQ9 | DDX55    | ATP-dependent RNA helicase     | 2.333333 | 1 | 2 | 1 | 600  | 68.503  | 9.25  |
| Q8NFW8 | CMAS     | N-acylneuraminate cytidylt     | 3.686636 | 1 | 2 | 1 | 434  | 48.349  | 7.93  |
| Q8NE71 | ABCF1    | ATP-binding cassette sub-fan   | 4.733728 | 3 | 5 | 3 | 845  | 95.866  | 6.8   |
| Q8NDT2 | RBM15B   | Putative RNA-binding protein   | 0.786517 | 1 | 2 | 1 | 890  | 97.147  | 9.85  |
| Q8NCA5 | FAM98A   | Protein FAM98A OS=Homo s       | 4.238921 | 1 | 2 | 1 | 519  | 55.366  | 9.03  |
| Q8N9N7 | LRRC57   | Leucine-rich repeat-containir  | 2.92887  | 1 | 2 | 1 | 239  | 26.737  | 8.43  |
| Q8N9M1 | C19orf47 | Uncharacterized protein C19    | 3.317536 | 1 | 2 | 1 | 422  | 44.718  | 10.11 |
| Q8N183 | NDUFAF2  | Mimitin, mitochondrial OS=H    | 18.3432  | 2 | 3 | 2 | 169  | 19.844  | 8.97  |
| Q8IYS2 | KIAA2013 | Uncharacterized protein KIAA   | 2.681388 | 1 | 1 | 1 | 634  | 69.113  | 8.19  |
| Q8IX12 | CCAR1    | Cell division cycle and apopto | 1.478261 | 1 | 2 | 1 | 1150 | 132.739 | 5.76  |
| Q8IVF5 | TIAM2    | T-lymphoma invasion and me     | 0.823045 | 1 | 1 | 1 | 1701 | 189.985 | 7.21  |
| Q86XP3 | DDX42    | ATP-dependent RNA helicase     | 1.066098 | 1 | 2 | 1 | 938  | 102.912 | 7.02  |
| Q86UE4 | MTDH     | Protein LYRIC OS=Homo sapi     | 1.890034 | 1 | 2 | 1 | 582  | 63.799  | 9.32  |
| Q7Z7H5 | TMED4    | Transmembrane emp24 dom        | 3.524229 | 1 | 2 | 1 | 227  | 25.926  | 8.28  |
| Q7Z6E9 | RBBP6    | E3 ubiquitin-protein ligase RB | 0.669643 | 1 | 2 | 1 | 1792 | 201.442 | 9.64  |
| Q7RTS9 | DYM      | Dymeclin OS=Homo sapiens       | 1.494768 | 1 | 2 | 1 | 669  | 75.887  | 5.86  |
| Q7KZF4 | SND1     | Staphylococcal nuclease dom    | 1.208791 | 1 | 2 | 1 | 910  | 101.934 | 7.17  |
| Q76L83 | ASXL2    | Putative Polycomb group pro    | 0.905923 | 1 | 2 | 1 | 1435 | 153.725 | 8.81  |
| Q71F56 | MED13L   | Mediator of RNA polymerase     | 0.542986 | 1 | 2 | 1 | 2210 | 242.447 | 6.04  |
| Q6ZU65 | UBN2     | Ubinuclein-2 OS=Homo sapie     | 1.039347 | 1 | 1 | 1 | 1347 | 145.998 | 9.19  |
| Q6XZF7 | DNMBP    | Dynamin-binding protein OS=    | 0.380469 | 1 | 2 | 1 | 1577 | 177.236 | 5.39  |
| Q6V1X1 | DPP8     | Dipeptidyl peptidase 8 OS=H    | 1.002227 | 1 | 2 | 1 | 898  | 103.293 | 5.8   |
| Q6PD62 | CTR9     | RNA polymerase-associated      | 1.449275 | 1 | 2 | 1 | 1173 | 133.42  | 6.77  |
| Q68E01 | INTS3    | Integrator complex subunit 3   | 2.876318 | 1 | 2 | 1 | 1043 | 117.994 | 5.8   |
| Q68CP9 | ARID2    | AT-rich interactive domain-co  | 1.253406 | 1 | 2 | 1 | 1835 | 197.268 | 7.42  |
| Q5VWC4 | PSMD4    | 26S proteasome non-ATPase      | 3.157895 | 1 | 2 | 1 | 380  | 41.053  | 4.81  |
| Q5VTL8 | PRPF38B  | Pre-mRNA-splicing factor 38B   | 2.014652 | 1 | 2 | 1 | 546  | 64.429  | 10.54 |
| Q5TGY3 | AHDC1    | AT-hook DNA-binding motif-c    | 4.054897 | 3 | 8 | 3 | 1603 | 168.245 | 9.04  |
| Q5T8P6 | RBM26    | RNA-binding protein 26 OS=H    | 2.085402 | 2 | 4 | 2 | 1007 | 113.527 | 9.16  |
| Q5SRQ6 | CSNK2B   | Casein kinase II subunit beta  | 3.846154 | 1 | 1 | 1 | 234  | 26.908  | 5.96  |

|        |          |                                                           |          |   |   |   |      |         |       |
|--------|----------|-----------------------------------------------------------|----------|---|---|---|------|---------|-------|
| Q53F19 | NCBP3    | Nuclear cap-binding protein 3                             | 2.096774 | 1 | 2 | 1 | 620  | 70.549  | 5.73  |
| Q4KMP7 | TBC1D10B | TBC1 domain family member 10B                             | 2.59901  | 1 | 2 | 1 | 808  | 87.145  | 9.19  |
| Q15773 | MLF2     | Myeloid leukemia factor 2 OS=Homo sapiens                 | 3.629032 | 1 | 2 | 1 | 248  | 28.129  | 6.9   |
| Q15554 | TERF2    | Telomeric repeat-binding factor 2                         | 3.874539 | 1 | 2 | 1 | 542  | 59.557  | 9.35  |
| Q15084 | PDIA6    | Protein disulfide-isomerase A6                            | 3.181818 | 1 | 2 | 1 | 440  | 48.091  | 5.08  |
| Q14781 | CBX2     | Chromobox protein homolog 2                               | 3.759398 | 1 | 2 | 1 | 532  | 56.046  | 10.01 |
| Q14451 | GRB7     | Growth factor receptor-bound protein 7                    | 6.203008 | 2 | 4 | 2 | 532  | 59.643  | 8.5   |
| Q14157 | UBAP2L   | Ubiquitin-associated protein 2L                           | 1.379945 | 1 | 2 | 1 | 1087 | 114.465 | 7.11  |
| Q13838 | DDX39B   | Spliceosome RNA helicase DDX39B                           | 8.64486  | 3 | 8 | 1 | 428  | 48.96   | 5.67  |
| Q13823 | GNL2     | Nucleolar GTP-binding protein 2                           | 2.46238  | 1 | 2 | 1 | 731  | 83.603  | 9.25  |
| Q13751 | LAMB3    | Laminin subunit beta-3 OS=Homo sapiens                    | 0.59727  | 1 | 2 | 1 | 1172 | 129.489 | 7.21  |
| Q13601 | KRR1     | KRR1 small subunit processor 1                            | 4.986877 | 2 | 4 | 2 | 381  | 43.638  | 9.77  |
| Q13535 | ATR      | Serine/threonine-protein kinase ATR                       | 0.491679 | 1 | 2 | 1 | 2644 | 301.172 | 7.43  |
| Q13501 | SQSTM1   | Sequestosome-1 OS=Homo sapiens                            | 5.909091 | 1 | 2 | 1 | 440  | 47.657  | 5.22  |
| Q13415 | ORC1     | Origin recognition complex subunit 1                      | 1.74216  | 1 | 2 | 1 | 861  | 97.289  | 9.22  |
| Q13347 | EIF3I    | Eukaryotic translation initiation factor 3 subunit I      | 14.15385 | 2 | 5 | 2 | 325  | 36.479  | 5.64  |
| Q13200 | PSMD2    | 26S proteasome non-ATPase subunit 2                       | 1.321586 | 1 | 2 | 1 | 908  | 100.136 | 5.2   |
| Q12962 | TAF10    | Transcription initiation factor 7 subunit 10              | 11.46789 | 1 | 2 | 1 | 218  | 21.698  | 6.57  |
| Q12948 | FOXC1    | Forkhead box protein C1 OS=Homo sapiens                   | 2.169982 | 1 | 2 | 1 | 553  | 56.753  | 8.51  |
| Q12888 | TP53BP1  | Tumor suppressor p53-binding protein 1                    | 1.064909 | 1 | 1 | 1 | 1972 | 213.443 | 4.7   |
| Q12802 | AKAP13   | A-kinase anchor protein 13 OS=Homo sapiens                | 0.497689 | 1 | 2 | 1 | 2813 | 307.359 | 5.24  |
| Q12768 | WASHC5   | WASH complex subunit structure 5                          | 1.121657 | 1 | 2 | 1 | 1159 | 134.201 | 6.98  |
| Q10570 | CPSF1    | Cleavage and polyadenylation specificity factor subunit 1 | 2.772003 | 3 | 6 | 3 | 1443 | 160.782 | 6.4   |
| Q04941 | PLP2     | Proteolipid protein 2 OS=Homo sapiens                     | 8.552632 | 1 | 2 | 1 | 152  | 16.68   | 7.24  |
| Q02952 | AKAP12   | A-kinase anchor protein 12 OS=Homo sapiens                | 1.234568 | 1 | 2 | 1 | 1782 | 191.367 | 4.41  |
| Q01804 | OTUD4    | OTU domain-containing protein 4                           | 4.578097 | 3 | 6 | 3 | 1114 | 123.968 | 6.71  |
| Q01664 | TFAP4    | Transcription factor AP-4 OS=Homo sapiens                 | 2.95858  | 1 | 2 | 1 | 338  | 38.702  | 5.87  |
| P98161 | PKD1     | Polycystin-1 OS=Homo sapiens                              | 0.836626 | 1 | 2 | 1 | 4303 | 462.239 | 6.73  |
| P78549 | NTHL1    | Endonuclease III-like protein 1                           | 2.884615 | 1 | 2 | 1 | 312  | 34.368  | 9.67  |
| P78347 | GTF2I    | General transcription factor II I                         | 4.308617 | 4 | 8 | 4 | 998  | 112.346 | 6.39  |
| P68400 | CSNK2A1  | Casein kinase II subunit alpha                            | 12.27621 | 3 | 5 | 3 | 391  | 45.115  | 7.74  |
| P62937 | PPIA     | Peptidyl-prolyl cis-trans isomerase A                     | 4.242424 | 1 | 2 | 1 | 165  | 18.001  | 7.81  |
| P62191 | PSMC1    | 26S protease regulatory subunit 1                         | 5.454545 | 2 | 4 | 2 | 440  | 49.154  | 6.21  |
| P61981 | YWHAG    | 14-3-3 protein gamma OS=Homo sapiens                      | 10.12146 | 3 | 8 | 2 | 247  | 28.285  | 4.89  |

|        |          |                                  |          |    |    |   |      |         |       |
|--------|----------|----------------------------------|----------|----|----|---|------|---------|-------|
| P61020 | RAB5B    | Ras-related protein Rab-5B O     | 15.34884 | 3  | 10 | 1 | 215  | 23.692  | 8.13  |
| P57721 | PCBP3    | Poly(rC)-binding protein 3 OS    | 17.52022 | 5  | 24 | 1 | 371  | 39.44   | 8.07  |
| P55795 | HNRNPH2  | Heterogeneous nuclear ribor      | 18.04009 | 6  | 27 | 1 | 449  | 49.232  | 6.3   |
| P53999 | SUB1     | Activated RNA polymerase II      | 11.81102 | 1  | 2  | 1 | 127  | 14.386  | 9.6   |
| P53396 | ACLY     | ATP-citrate synthase OS=Horn     | 0.817439 | 1  | 2  | 1 | 1101 | 120.762 | 7.33  |
| P52756 | RBM5     | RNA-binding protein 5 OS=Horn    | 1.840491 | 1  | 2  | 1 | 815  | 92.097  | 6.28  |
| P52294 | KPNA1    | Importin subunit alpha-5 OS=     | 1.672862 | 1  | 1  | 1 | 538  | 60.184  | 5.01  |
| P51659 | HSD17B4  | Peroxisomal multifunctional      | 3.668478 | 2  | 4  | 2 | 736  | 79.636  | 8.84  |
| P51648 | ALDH3A2  | Fatty aldehyde dehydrogenas      | 2.474227 | 1  | 2  | 1 | 485  | 54.813  | 7.88  |
| P51149 | RAB7A    | Ras-related protein Rab-7a O     | 5.31401  | 1  | 2  | 1 | 207  | 23.475  | 6.7   |
| P50213 | IDH3A    | Isocitrate dehydrogenase [NA     | 6.284153 | 2  | 4  | 2 | 366  | 39.566  | 6.92  |
| P49327 | FASN     | Fatty acid synthase OS=Horn      | 1.075269 | 2  | 3  | 2 | 2511 | 273.254 | 6.44  |
| P48443 | RXRG     | Retinoic acid receptor RXR-ga    | 2.37581  | 1  | 2  | 1 | 463  | 50.838  | 7.62  |
| P42285 | MTREX    | Superkiller viralicidic activity | 2.495202 | 2  | 4  | 2 | 1042 | 117.729 | 6.52  |
| P39748 | FEN1     | Flap endonuclease 1 OS=Horn      | 8.684211 | 3  | 5  | 3 | 380  | 42.566  | 8.62  |
| P38646 | HSPA9    | Stress-70 protein, mitochond     | 1.767305 | 1  | 1  | 1 | 679  | 73.635  | 6.16  |
| P35269 | GTF2F1   | General transcription factor II  | 3.868472 | 1  | 2  | 1 | 517  | 58.205  | 7.49  |
| P32322 | PYCR1    | Pyrroline-5-carboxylate redu     | 3.448276 | 1  | 2  | 1 | 319  | 33.34   | 7.61  |
| P30153 | PPP2R1A  | Serine/threonine-protein pho     | 1.697793 | 1  | 2  | 1 | 589  | 65.267  | 5.11  |
| P30040 | ERP29    | Endoplasmic reticulum reside     | 2.681992 | 1  | 2  | 1 | 261  | 28.975  | 7.31  |
| P28290 | SSFA2    | Sperm-specific antigen 2 OS=     | 1.350278 | 1  | 2  | 1 | 1259 | 138.3   | 5.19  |
| P26006 | ITGA3    | Integrin alpha-3 OS=Homo sa      | 0.856327 | 1  | 2  | 1 | 1051 | 116.538 | 6.77  |
| P20042 | EIF2S2   | Eukaryotic translation initiati  | 3.003003 | 1  | 2  | 1 | 333  | 38.364  | 5.8   |
| P19784 | CSNK2A2  | Casein kinase II subunit alpha   | 2.571429 | 1  | 2  | 1 | 350  | 41.187  | 8.56  |
| P17931 | LGALS3   | Galectin-3 OS=Homo sapiens       | 5.6      | 1  | 1  | 1 | 250  | 26.136  | 8.56  |
| P17041 | ZNF32    | Zinc finger protein 32 OS=Ho     | 3.663004 | 1  | 2  | 1 | 273  | 31.009  | 9.35  |
| P16401 | HIST1H1B | Histone H1.5 OS=Homo sapie       | 25.22124 | 5  | 13 | 3 | 226  | 22.566  | 10.92 |
| P13639 | EEF2     | Elongation factor 2 OS=Horn      | 3.729604 | 2  | 4  | 2 | 858  | 95.277  | 6.83  |
| P12270 | TPR      | Nucleoprotein TPR OS=Horn        | 0.46551  | 1  | 2  | 1 | 2363 | 267.131 | 5.02  |
| P12268 | IMPDH2   | Inosine-5'-monophosphate d       | 1.55642  | 1  | 2  | 1 | 514  | 55.77   | 6.9   |
| P11940 | PABPC1   | Polyadenylate-binding protei     | 2.201258 | 1  | 2  | 1 | 636  | 70.626  | 9.5   |
| P10588 | NR2F6    | Nuclear receptor subfamily 2     | 1.980198 | 1  | 2  | 1 | 404  | 42.952  | 7.78  |
| P08651 | NFIC     | Nuclear factor 1 C-type OS=H     | 3.543307 | 1  | 2  | 1 | 508  | 55.64   | 8.38  |
| P04350 | TUBB4A   | Tubulin beta-4A chain OS=Horn    | 41.21622 | 16 | 95 | 2 | 444  | 49.554  | 4.88  |

|        |         |                                 |          |   |   |   |      |         |      |
|--------|---------|---------------------------------|----------|---|---|---|------|---------|------|
| O96005 | CLPTM1  | Cleft lip and palate transmem   | 1.494768 | 1 | 1 | 1 | 669  | 76.048  | 6.3  |
| O95983 | MBD3    | Methyl-CpG-binding domain       | 7.560137 | 3 | 7 | 1 | 291  | 32.823  | 5.34 |
| O95816 | BAG2    | BAG family molecular chaper     | 3.791469 | 1 | 2 | 1 | 211  | 23.757  | 6.7  |
| O95785 | WIZ     | Protein Wiz OS=Homo sapien      | 2.119927 | 2 | 4 | 2 | 1651 | 178.563 | 6.86 |
| O95573 | ACSL3   | Long-chain-fatty-acid--CoA lig  | 1.527778 | 1 | 2 | 1 | 720  | 80.368  | 8.38 |
| O95251 | KAT7    | Histone acetyltransferase KA    | 4.582651 | 2 | 4 | 2 | 611  | 70.598  | 8.85 |
| O95104 | SCAF4   | Splicing factor, arginine/serin | 1.743679 | 2 | 4 | 1 | 1147 | 125.79  | 9.55 |
| O75152 | ZC3H11A | Zinc finger CCCH domain-con     | 3.45679  | 2 | 4 | 2 | 810  | 89.076  | 8.37 |
| O75146 | HIP1R   | Huntingtin-interacting protei   | 1.310861 | 1 | 2 | 1 | 1068 | 119.315 | 6.67 |
| O60664 | PLIN3   | Perilipin-3 OS=Homo sapiens     | 3.917051 | 1 | 2 | 1 | 434  | 47.046  | 5.44 |
| O60506 | SYNCRIP | Heterogeneous nuclear ribor     | 7.383628 | 3 | 8 | 2 | 623  | 69.56   | 8.59 |
| O60216 | RAD21   | Double-strand-break repair p    | 1.584786 | 1 | 2 | 1 | 631  | 71.645  | 4.65 |
| O15294 | OGT     | UDP-N-acetylglucosamine--p      | 1.529637 | 1 | 1 | 1 | 1046 | 116.85  | 6.7  |
| O15226 | NKRF    | NF-kappa-B-repressing factor    | 1.594203 | 1 | 2 | 1 | 690  | 77.624  | 8.79 |
| O14776 | TCERG1  | Transcription elongation regu   | 1.092896 | 1 | 2 | 1 | 1098 | 123.823 | 8.65 |
| O14647 | CHD2    | Chromodomain-helicase-DNA       | 0.929978 | 2 | 6 | 1 | 1828 | 211.214 | 8.1  |
| O00767 | SCD     | Acyl-CoA desaturase OS=Horn     | 6.963788 | 1 | 1 | 1 | 359  | 41.496  | 9    |
| O00257 | CBX4    | E3 SUMO-protein ligase CBX4     | 1.428571 | 1 | 1 | 1 | 560  | 61.329  | 9.36 |
| O00255 | MEN1    | Menin OS=Homo sapiens GN        | 2.601626 | 1 | 2 | 1 | 615  | 67.981  | 6.55 |
| O00148 | DDX39A  | ATP-dependent RNA helicase      | 8.196721 | 3 | 8 | 1 | 427  | 49.098  | 5.68 |
| J3QQJ0 | SAP30BP | SAP30-binding protein (Fragr    | 4.615385 | 1 | 2 | 1 | 325  | 35.861  | 4.98 |
| I3L504 | EIF5A   | Eukaryotic translation initiati | 4.301075 | 1 | 2 | 1 | 186  | 20.49   | 5.25 |
| I3L1Q2 | BCL7C   | B-cell CLL/lymphoma 7 prote     | 4.095563 | 1 | 1 | 1 | 293  | 32.816  | 6.46 |
| H7CON4 | SF1     | Splicing factor 1 (Fragment) C  | 9.444444 | 1 | 2 | 1 | 180  | 18.738  | 9.57 |
| H7BZJ3 | PDIA3   | Protein disulfide-isomerase A   | 31.70732 | 3 | 7 | 1 | 123  | 13.511  | 7.3  |
| H0YGF8 | PLCD3   | 1-phosphatidylinositol 4,5-bis  | 27.92793 | 1 | 1 | 1 | 111  | 12.301  | 7.93 |
| H0Y9X1 | TMA16   | Translation machinery-associ    | 6.198347 | 1 | 2 | 1 | 242  | 27.664  | 9.57 |
| G5E9T8 | GOSR1   | Golgi SNAP receptor complex     | 7.843137 | 2 | 3 | 2 | 255  | 29.064  | 9.91 |
| F8W0W8 | PPP1CC  | Serine/threonine-protein pho    | 5.722892 | 2 | 6 | 1 | 332  | 38.225  | 6.83 |
| E7EX29 | YWHAZ   | 14-3-3 protein zeta/delta (Fr   | 8.943089 | 2 | 6 | 1 | 246  | 28.019  | 4.92 |
| E7ERK9 | EIF2B4  | Translation initiation factor e | 2.573529 | 1 | 2 | 1 | 544  | 59.677  | 9.42 |
| E7EMB3 | CALM2   | Calmodulin OS=Homo sapien       | 8.163265 | 1 | 2 | 1 | 196  | 21.675  | 4.56 |
| E5KLJ5 | OPA1    | Dynamin-like 120 kDa protei     | 0.985222 | 1 | 2 | 1 | 1015 | 117.67  | 7.77 |
| D6W592 | HNRNPLL | Heterogeneous nuclear ribor     | 2.767528 | 1 | 2 | 1 | 542  | 60.061  | 7.85 |

|            |         |                                  |          |   |   |   |      |         |      |
|------------|---------|----------------------------------|----------|---|---|---|------|---------|------|
| D6RER5     | SEPT11  | Septin-11 OS=Homo sapiens        | 3.009259 | 1 | 1 | 1 | 432  | 49.777  | 6.68 |
| D3DQV9     | EIF4G2  | Eukaryotic translation initiati  | 0.882029 | 1 | 1 | 1 | 907  | 102.265 | 7.14 |
| C9JCC6     | DRAP1   | Dr1-associated corepressor C     | 4.716981 | 1 | 2 | 1 | 212  | 23.19   | 5.27 |
| B5MCJ9     | TRIM66  | Tripartite motif-containing pr   | 2.730924 | 1 | 2 | 1 | 1245 | 137.57  | 6.7  |
| B4E2Q0     | ATP2C1  | Calcium-transporting ATPase      | 1.259182 | 1 | 2 | 1 | 953  | 104.645 | 7.2  |
| B4DLN1     | N/A     | cDNA FLJ60124, Foundly simi      | 2.714932 | 1 | 2 | 1 | 442  | 48.069  | 9.52 |
| B3KTM8     | MORF4L1 | Mortality factor 4-like protei   | 2.873563 | 1 | 2 | 1 | 348  | 40.004  | 9.11 |
| AOA0X1KG71 | NELFB   | Negative elongation factor B     | 3.025478 | 2 | 3 | 2 | 628  | 69.995  | 6.04 |
| AOA0U1RQQ9 | SCYL2   | SCY1-like protein 2 OS=Homc      | 1.714898 | 1 | 2 | 1 | 933  | 104.046 | 8.22 |
| AOA0C4DFX9 | NELFA   | Negative elongation factor A     | 8.719852 | 2 | 4 | 2 | 539  | 58.462  | 9.26 |
| AOA087WUE4 | LENG8   | Leukocyte receptor cluster m     | 1.830664 | 1 | 2 | 1 | 874  | 95.485  | 9.32 |
| AOA075B746 | MRPS21  | 28S ribosomal protein S21, m     | 9.195402 | 1 | 2 | 1 | 87   | 10.681  | 9.92 |
| AOA024QZP7 | CDK1    | Cell division cycle 2, G1 to S a | 5.387205 | 1 | 2 | 1 | 297  | 34.06   | 8.4  |
